# Supplementary material for: Performance and mechanism of a bioelectrochemical system for reduction of heavy metal cadmium ions
Source: Royal Society of Chemistry journal article supplement (doi:10.1039/d3ra07771c), 2024-01-01
Supplement: d3ra07771c1.pdf [file d3ra07771c1.pdf]

## Supporting Information

### **Performance and mechanism of a bioelectrochemical system for the reduction in heavy metal cadmium ions**

XiaXia Wang<sup>a</sup>, Yu Zhao<sup>\*a</sup>, Li'E Jin<sup>\*a</sup>, Bin Liu<sup>a</sup>,

<sup>a</sup>Institute of Clean Chemical Engineering, College of Chemistry and Chemical Engineering, Taiyuan University of Technology, Taiyuan 030024, China.

\* Corresponding authors

E-mail address: zhaoyu@tyut.edu.cn (Zhao) and lejin2003@163.com (Jin)

TEXT (1)

FIGURES (8)

TABLE (3)

PAGES (7)

## S1. Materials and methods

### 1. Current density (A/cm<sup>2</sup>):

$$I_D = I/S \quad (1)$$

### 2. Total coulombs transferred (CT):

$$Q = \int_0^t Idt \quad (2)$$

### 3. Cathodic coulomb efficiency (CE<sub>ca</sub>) :

$$CE_{ca}^{cd} = \frac{a \times V_{ca} \times \Delta C_{cd} \times F}{M_{cd} \times \int_0^t Idt} \times 100\% \quad (3)$$

### 4. Cathode energy efficiency:

$$\eta_{E_{cd}} = \frac{a \times n_{cd} \times E_{cd} \times F}{\int_0^t Idt \times E_{ps}} \times 100\% \quad (4)$$

### 5. The unit energy consumption of the cathode (kwh/kg):

$$energy\ consumption = \frac{1000 \times E_{ps} \times \int_0^t Idt}{n_{cd} \times M_{cd} \times 3600 \times 1000} \quad (5)$$

In the above formula:

a—number of electrons consumed to reduce a unit amount of Cd;

F—Faraday's constant (9.64853×10<sup>4</sup>C·mol<sup>-1</sup>) ;

I—current (A);

S—Cathode electrode area (cm<sup>2</sup>) ;

Δt—running time per cycle (s);

V<sub>ca</sub>—an effective volume of the cathode chamber of the MECs(V);

ΔCd—the difference in Cd(II) concentration between the inlet and outlet water of the

MECs cathode ( $\text{mg}\cdot\text{L}^{-1}$ );

$M_{\text{Cd}}$ —relative atomic weight of cadmium ( $\text{g}\cdot\text{mol}^{-1}$ );

$n_{\text{cd}}$ —amount of Cd(II) removed by MECs per cycle (mol);

$E_{\text{cd}}$ —the standard electrode potential of Cd(II) (V);

$E_{\text{ps}}$ —applied voltage (V);

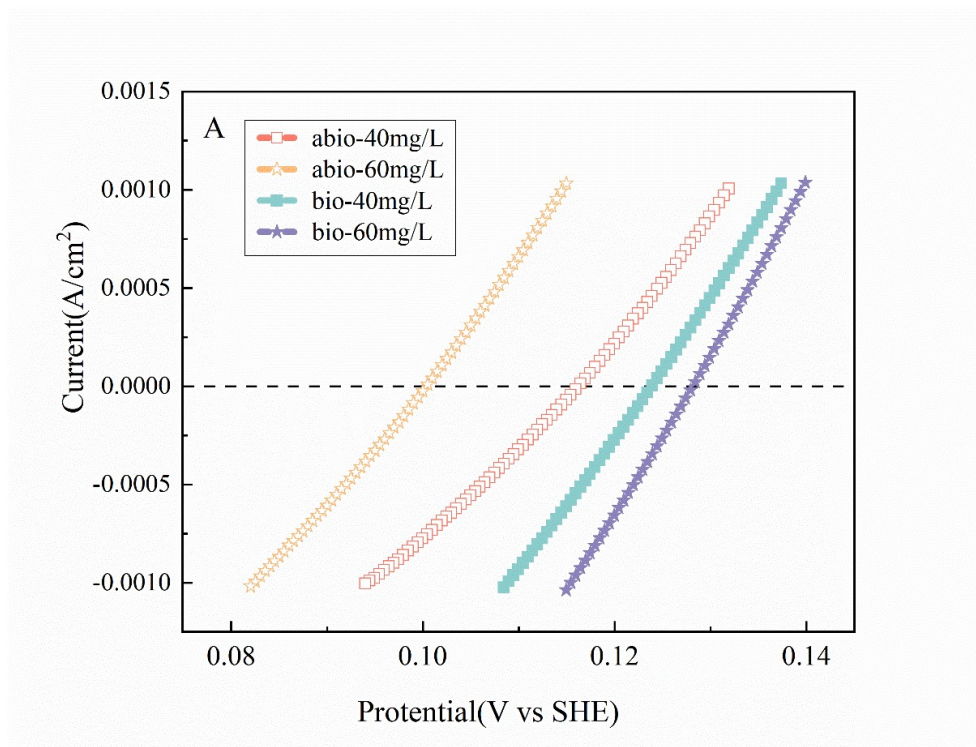

Fig.S 1 Part of Cyclic voltammograms (A) for biocathodes and non-biocathodes (initial Cd(II): 40  $\text{mg}\cdot\text{L}^{-1}$ , 60  $\text{mg}\cdot\text{L}^{-1}$ ; applied voltage: 0.5 V).

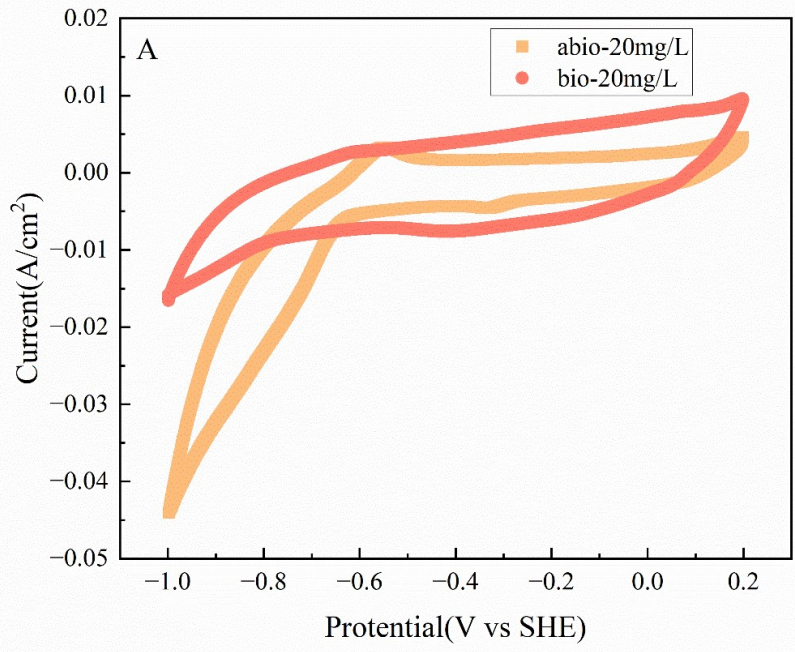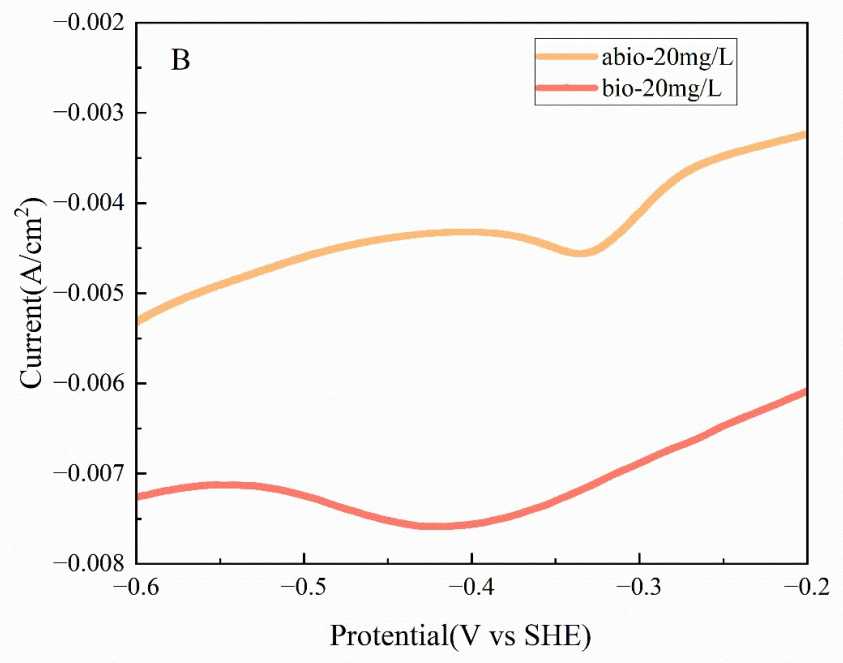

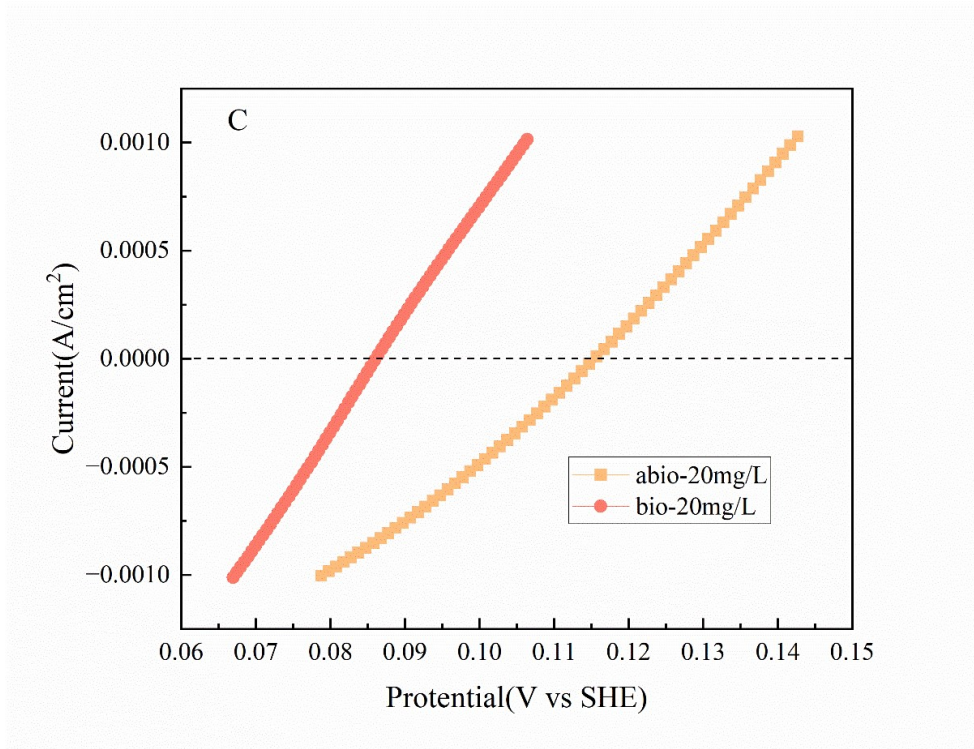

Fig.S 2 Cyclic voltammograms with biocathodes and abiotic cathodes (A · B · C)(initial acetate: 1.0 g·L<sup>-1</sup>; initial Cd(II): 20 mg·L<sup>-1</sup>; applied voltage:0.5V).

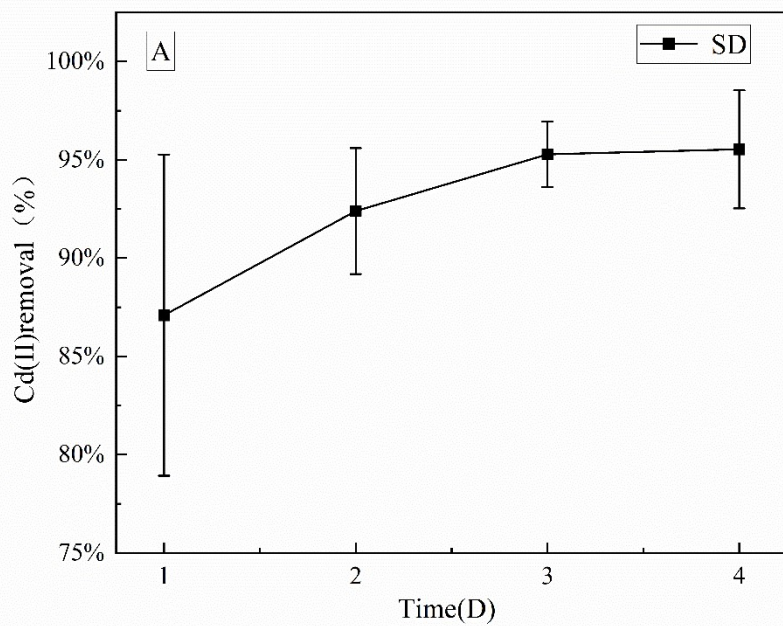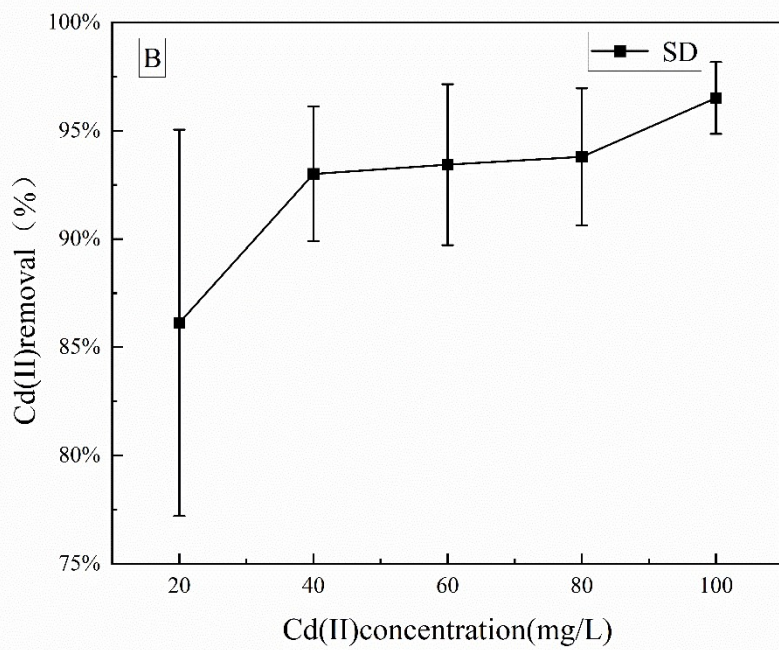

Fig.S 3 Standard deviations are plotted for different times(A) as well as for different concentrations (B).

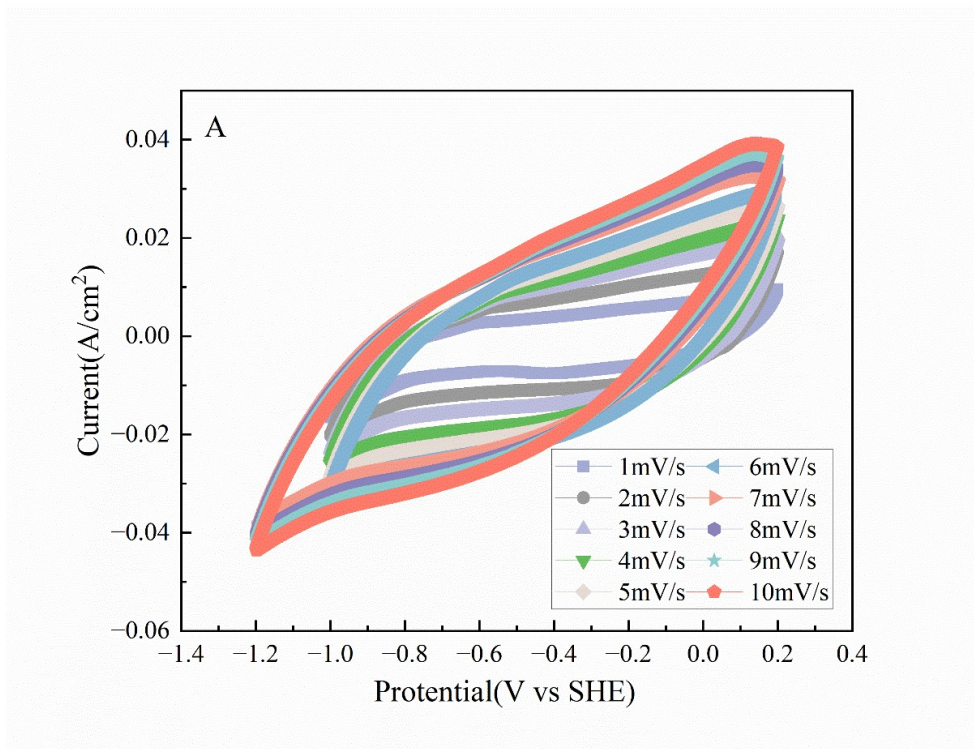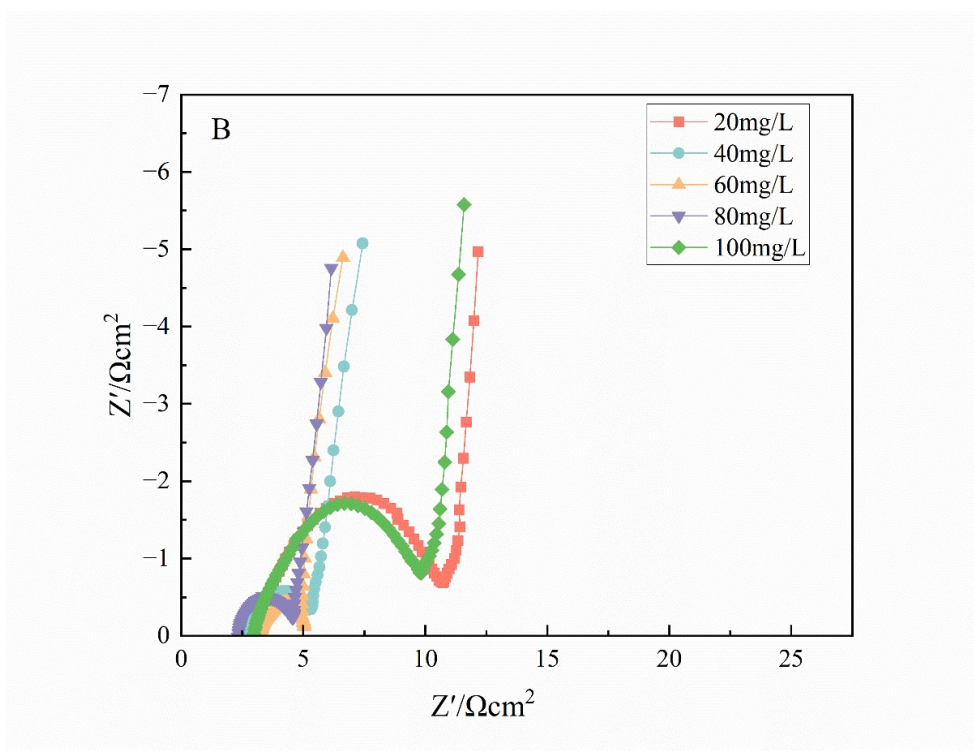

Fig.S 4 Cyclic voltammograms for different scan rates (A) ( initial acetate:  $1.0 \text{ g}\cdot\text{L}^{-1}$ ; initial Cd(II):  $20 \text{ mg}\cdot\text{L}^{-1}$ ; scan rate :  $1\text{-}10\text{mV}\cdot\text{s}^{-1}$ ;) and electrochemical impedance diagram for different concentrations of Cd(II) solutions (B)( initial Cd(II): $20\text{-}100\text{mg}\cdot\text{L}^{-1}$ ).

Table.S 1 Equivalent circuit data analysis table for electrochemical impedance spectra of different concentrations of Cd (II) solutions (initial acetate: 1.0 g·L<sup>-1</sup>; applied voltage: 0.5 V).

|        | Cd(II)mg/L | Rs/Ω   | Rct/Ω  | W/Ω    |
|--------|------------|--------|--------|--------|
| biotic | 20         | 3.0126 | 7.7990 | 28.618 |
|        | 40         | 2.7346 | 2.6872 | 26.255 |
|        | 60         | 3.3384 | 1.7643 | 20.544 |
|        | 80         | 2.3696 | 2.0566 | 11.539 |
|        | 100        | 2.9131 | 7.5825 | 37.940 |

Table.S 2 Comparison of cathodic electrons for cathodic Cd(II) reduction (CE<sub>ca</sub>, Cd) at different initial Cd(II) concentrations, and energy efficiency of energy consumed for Cd(II) reduction (η<sub>E</sub>, Cd), cathodic unit energy consumption (kwh·kg<sup>-1</sup>).initial acetate concentration: 1.0 g·L<sup>-1</sup>)

| Cd(II)(mg·L <sup>-1</sup> ) | d | Q(C)      | Δcd(mg·L <sup>-1</sup> ) | CE <sub>ca</sub> , Cd | η <sub>E</sub> , Cd | Kwh·kg <sup>-1</sup> |
|-----------------------------|---|-----------|--------------------------|-----------------------|---------------------|----------------------|
| 20                          | 1 | 125425.8  | 14.606                   | 1.60%                 | 1.29%               | 14.91                |
|                             | 2 | 224866.8  | 17.624                   | 1.08%                 | 0.87%               | 22.15                |
|                             | 3 | 277160.4  | 18.514                   | 0.92%                 | 0.74%               | 25.99                |
|                             | 4 | 317682    | 18.159                   | 0.79%                 | 0.63%               | 30.37                |
| 40                          | 1 | 123832    | 35.374                   | 3.92%                 | 3.16%               | 6.08                 |
|                             | 2 | 184182.66 | 37.528                   | 2.80%                 | 2.26%               | 8.52                 |
|                             | 3 | 253914.48 | 38.154                   | 2.06%                 | 1.66%               | 11.55                |
|                             | 4 | 297979.56 | 37.751                   | 1.74%                 | 1.40%               | 13.70                |
| 60                          | 1 | 162016.5  | 53.513                   | 4.54%                 | 3.66%               | 5.26                 |
|                             | 2 | 248972.7  | 54.88                    | 3.03%                 | 2.44%               | 7.88                 |
|                             | 3 | 292424.7  | 57.691                   | 2.71%                 | 2.18%               | 8.80                 |
|                             | 4 | 315608.7  | 58.156                   | 2.53%                 | 2.04%               | 9.42                 |
| 80                          | 1 | 79038     | 72.52                    | 15.75%                | 12.70%              | 1.51                 |
|                             | 2 | 215982    | 73.39                    | 5.83%                 | 4.70%               | 4.09                 |
|                             | 3 | 264925.8  | 76.23                    | 4.94%                 | 3.98%               | 4.83                 |
|                             | 4 | 283933.8  | 78                       | 4.72%                 | 3.80%               | 5.06                 |
| 100                         | 1 | 75639.42  | 94.17                    | 17.10%                | 13.78%              | 1.39                 |
|                             | 2 | 164903.94 | 96.81                    | 8.06%                 | 6.50%               | 2.96                 |
|                             | 3 | 225868.86 | 97                       | 5.90%                 | 4.75%               | 4.04                 |
|                             | 4 | 278735.94 | 98.08                    | 4.83%                 | 3.89%               | 4.93                 |



Table.S 3 Similarity-based OTUs and species richness and diversity estimates

|         | OTUs | Shannon | Simpson | ACE     | Chao1   | Coverage/% |
|---------|------|---------|---------|---------|---------|------------|
| CA_1_Cd | 1923 | 7.59    | 0.96    | 1978.27 | 1956.40 | 99.78%     |
| OR_1    | 1658 | 5.75    | 0.83    | 1748.33 | 1716.26 | 99.70%     |

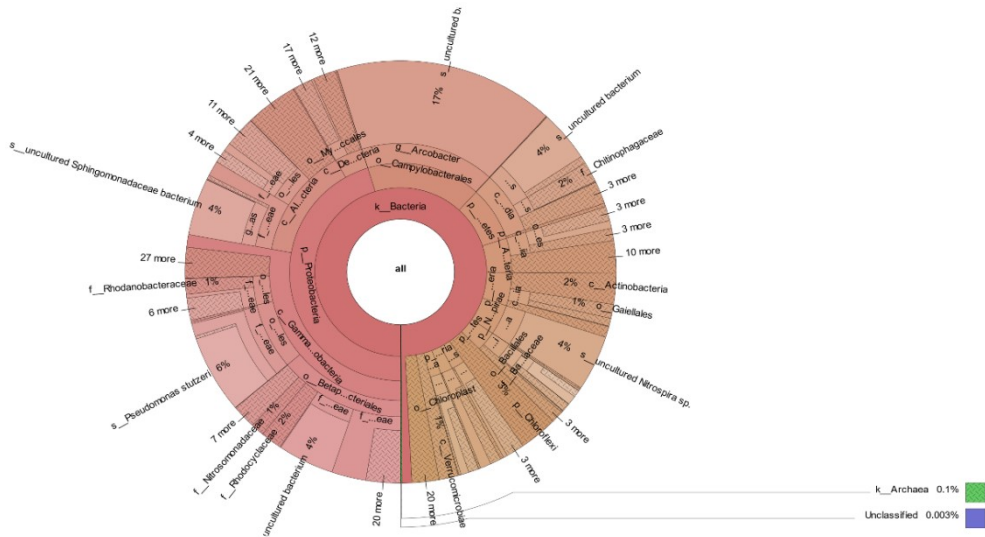

Fig.S 5Krona graph for the order classification of cadmium-containing sludge.

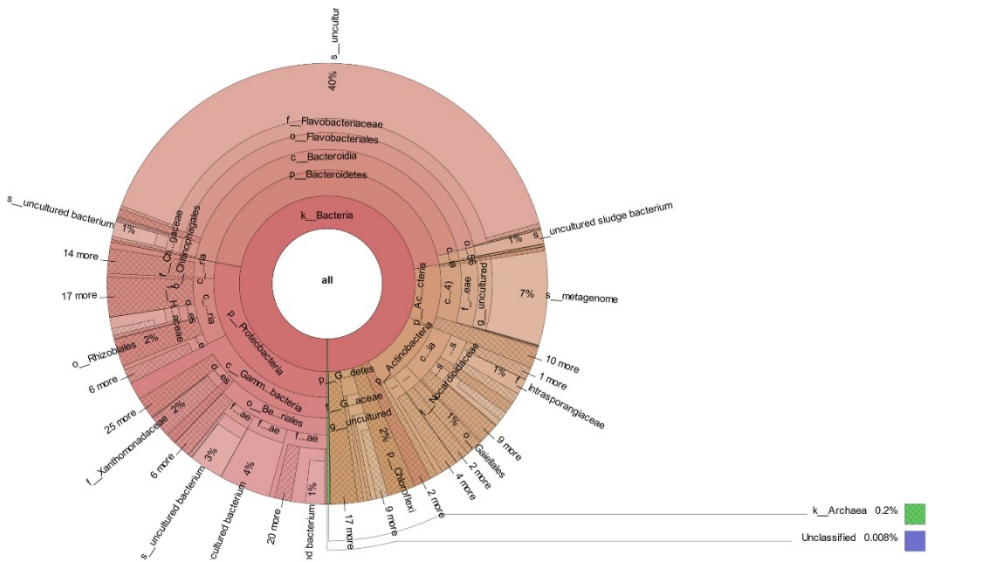

Fig.S 6 Krona graph for the order classification of raw sludge.
